# Supplementary material for: Use of Oxidative Stress Responses to Determine the Efficacy of Inactivation Treatments on Cryptosporidium Oocysts
Source: MDPI journal article supplement (doi:10.3390/microorganisms9071463), 2021-07-08
Supplement: s1 [file s1]

## List of Supplementary tables and figures

### Optimisation of the RNA quality

The quality of RNA was severely affected by the bead-beating condition. Different durations of bead-beating were tested against a fixed speed (4 m/s). It was shown that the quality of RNA was severely affected when the duration of bead-beating was longer than 30 s. The Bioanalyzer results showed that the samples subjected to bead beating of 60 s were of very low quality and the degradation was so severe that no RIN value was reported.

The optimised method included a mild lysis approach with bead-beating only for 25 s and putting the lysate on ice in between the cycles of bead-beating for 3 min.

Table S1. The assessment of quality of RNA, using Agilent's Bioanalyzer, extracted from 10 million oocysts of *C. parvum* under different conditions and kits

| Bead-beating condition                 | RIN                  |                       |
|----------------------------------------|----------------------|-----------------------|
|                                        | RNeasy Plus mini kit | PureLink RNA mini kit |
| 4 m/s for 15 s (2 cycles)              | 9.2                  | 9.2                   |
| 4 m/s for 30 s (2 cycles)              | 9.0                  | 8.5                   |
| 4 m/s for 60 s (2 cycles)              | NA                   | ND                    |
| 4 m/s for 20 s (3 cycles)              | 9.5                  | ND                    |
| 4 m/s for 20 s (3 cycles) <sup>a</sup> | NA                   | NA                    |
| 6 m/s for 20 s (3 cycles)              | NA                   | NA                    |
| 6 m/s for 20 s (3 cycles)              | 7 <sup>b</sup>       | ND                    |
| 6 m/s for 20 s (3 cycles) <sup>a</sup> | NA <sup>b</sup>      | ND                    |

<sup>a</sup> garnet beads used instead of the lysing matrix E tube

<sup>b</sup> extracted using QIAcube automated system

ND: not done

NA: RIN not available

Table S2. The overall alignment rate of trimmed reads against the reference genome and transcriptome of *Cryptosporidium parvum*

| Sample     | Raw reads | Trimmed reads | Overall alignment rate (%) |        |
|------------|-----------|---------------|----------------------------|--------|
|            |           |               | STAR                       | Salmon |
| control 1  | 27878598  | 26620351      | 97.96                      | 93.20  |
| control 2  | 23459177  | 23075085      | 97.77                      | 94.90  |
| control 3  | 17486930  | 16539962      | 98.19                      | 94.40  |
| control 4  | 13061000  | 12752419      | 98.40                      | 94.70  |
| Xanth_ox_1 | 23377041  | 22510385      | 96.45                      | 89.30  |
| Xanth_ox_2 | 19825148  | 19397343      | 96.46                      | 89.50  |
| Xanth_ox_3 | 15911371  | 15380705      | 96.40                      | 90.10  |
| Xanth_ox_4 | 18693182  | 18319921      | 97.64                      | 92.30  |
| 1M_MSB_1   | 20636906  | 19628468      | 98.75                      | 94.50  |
| 1M_MSB_2   | 24400998  | 24019388      | 99.01                      | 95.60  |
| 1M_MSB_3   | 19455385  | 18888633      | 98.78                      | 94.70  |
| 1M_MSB_4   | 29212927  | 28039553      | 99.03                      | 95.90  |
| 0.1M_MSB_1 | 17954612  | 16999783      | 98.68                      | 95.10  |
| 0.1M_MSB_2 | 25264410  | 24818569      | 98.70                      | 95.40  |
| 0.1M_MSB_3 | 20265589  | 19943975      | 98.61                      | 95.50  |
| 0.1M_MSB_4 | 17021326  | 16172993      | 98.42                      | 95.00  |

---

|              |          |          |       |       |
|--------------|----------|----------|-------|-------|
| Heat_shock_1 | 25417560 | 24546200 | 98.32 | 92.70 |
| Heat_shock_2 | 26218711 | 25825395 | 98.5  | 93.70 |
| Heat_shock_3 | 23328379 | 22719854 | 98.42 | 93.50 |
| Heat_shock_4 | 21647093 | 21266741 | 98.76 | 94.30 |

---

Table S3. List of potential target genes selected for the assessment of the viability of *Cryptosporidium* oocysts using the novel comparative RT-qPCR method

| Gene ID*  | Gene name                   | Log2foldchange |
|-----------|-----------------------------|----------------|
| cgd4_500  | COWP7                       | 5.3            |
| cgd8_920  | UDP-glucose 6-dehydrogenase | 4.8            |
| cgd7_4080 | Thioredoxin                 | 4.7            |
| cgd7_4240 | Prohibitin                  | 4              |
| cgd7_470  | Type 3 Malate dehydrogenase | 4              |
| cgd4_3270 | HSP70                       | 2.6            |

\* according to <https://cryptodb.org/cryptodb/app>

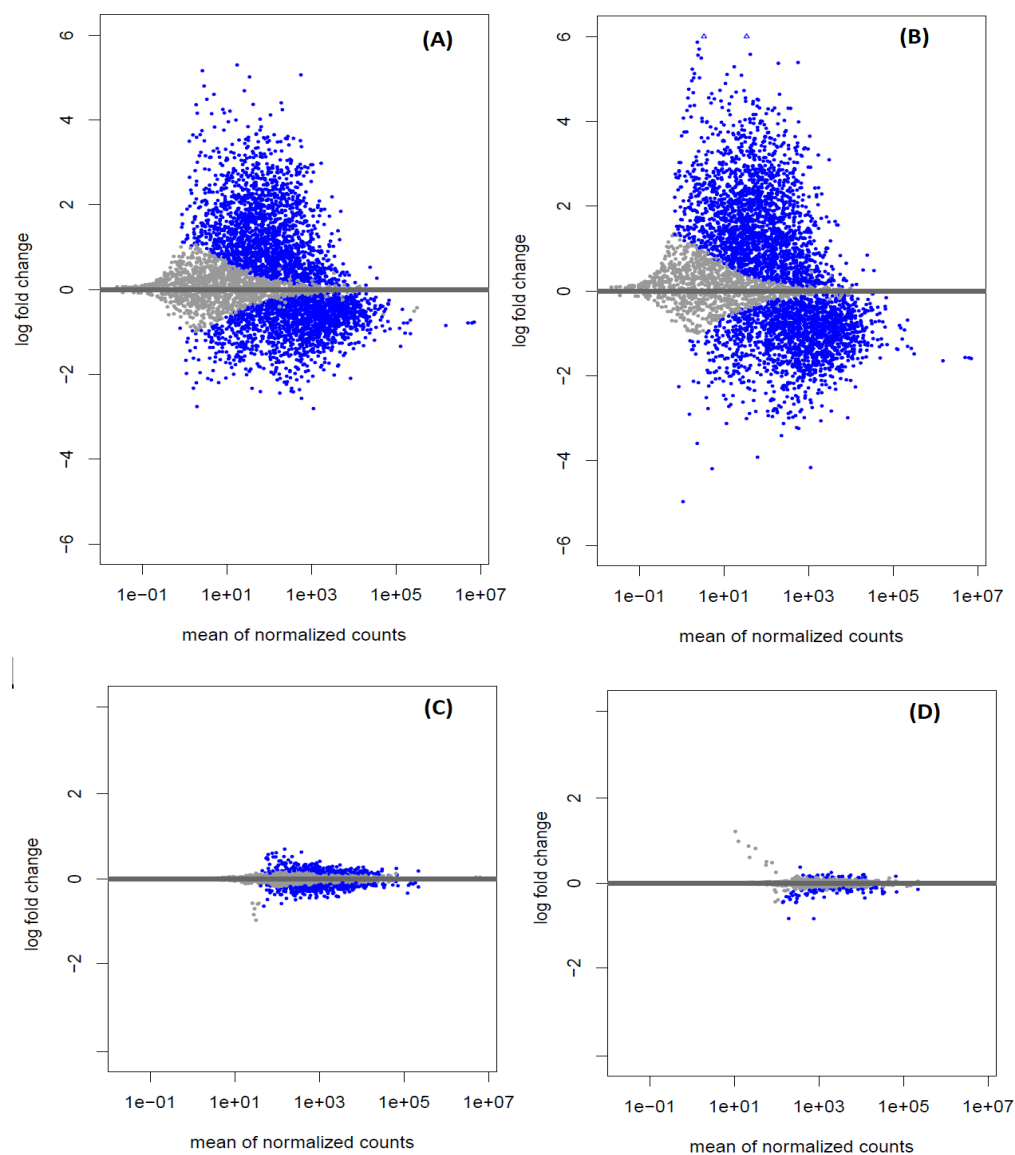

Figure S1. The MA-plot representing gene expression differences following (A) heat shock treatment (37 °C for 20 min), (B) xanthine oxidase and hypoxanthine reaction, (C) 0.1M MSB treatment, (D) 1M MSB treatment compared to the untreated control group.

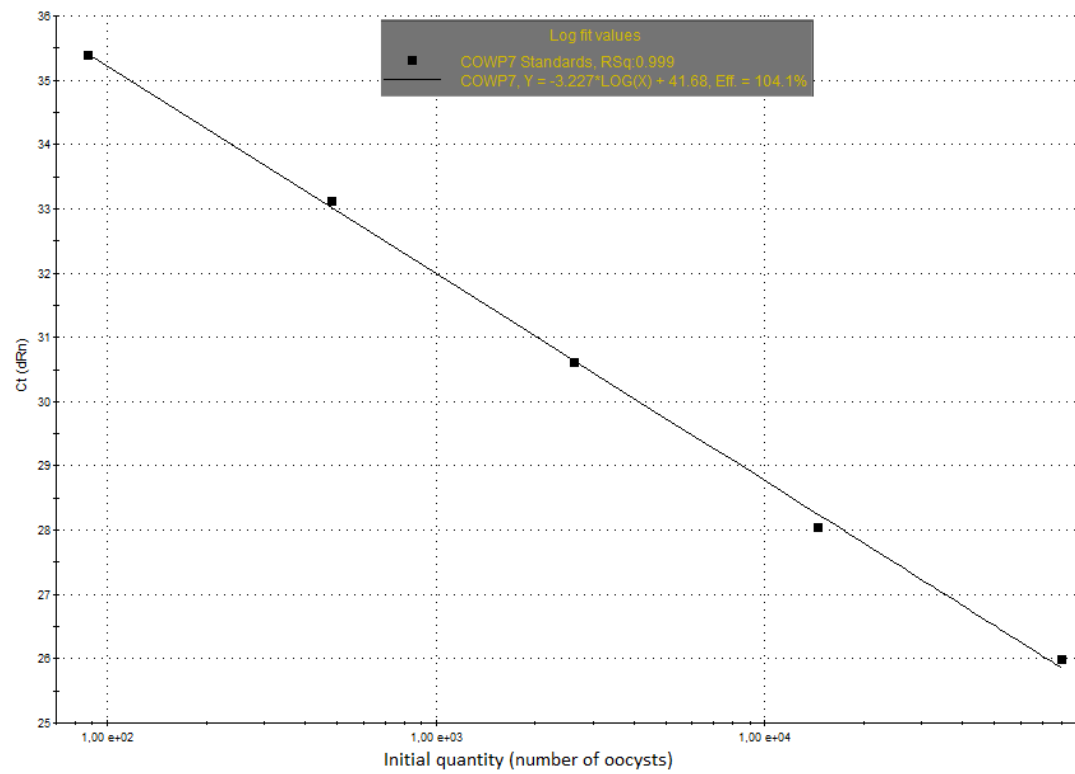

Figure S2. The standard curve prepared by using 5-fold serial dilution of RNA extracted from 2 million oocysts of *C. parvum*.

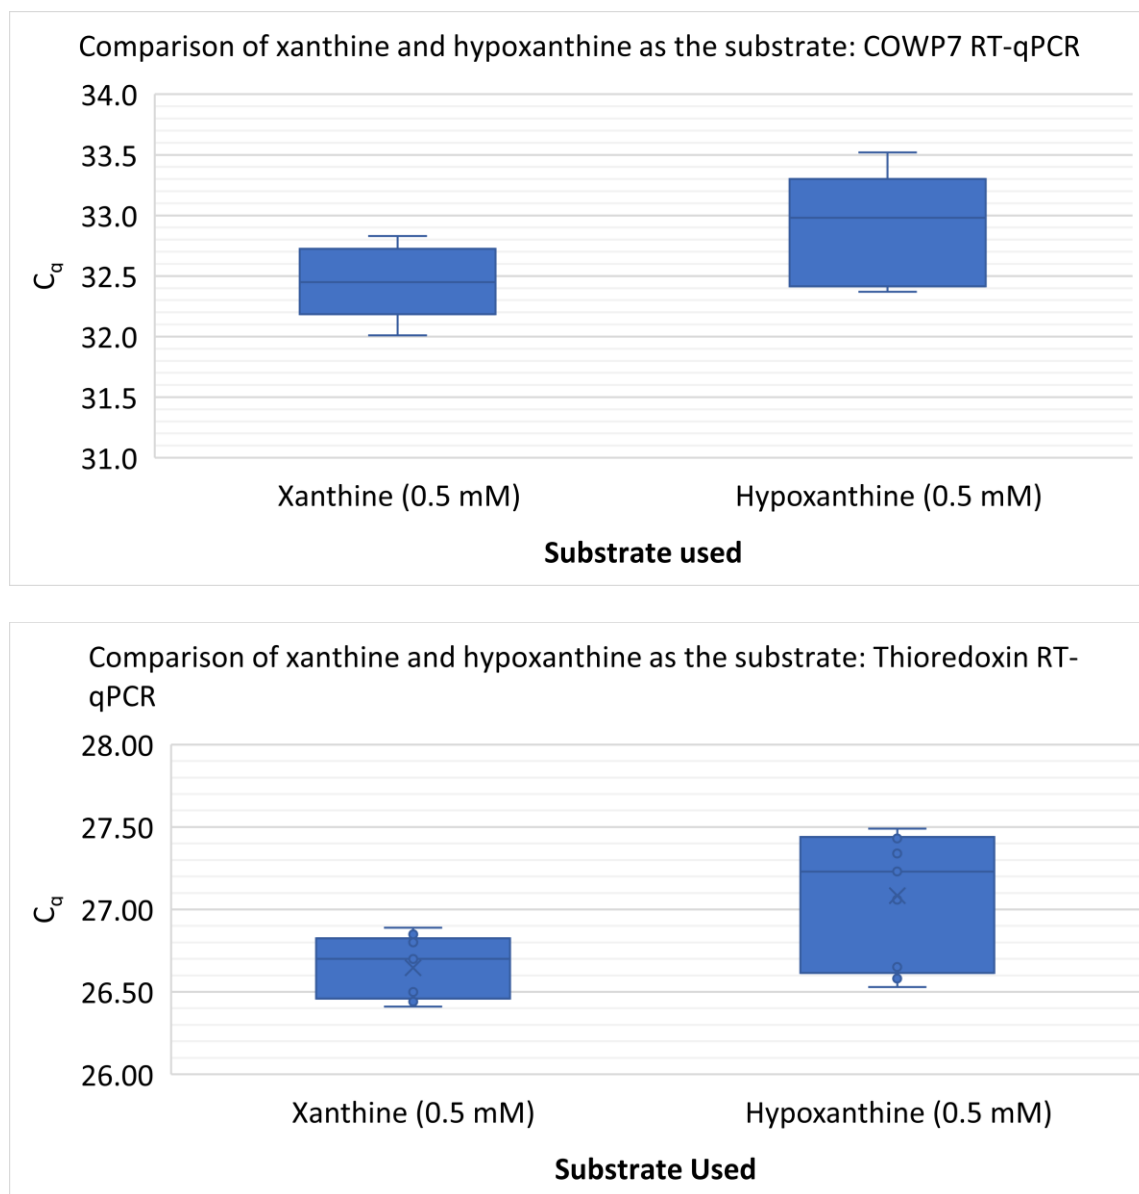

Figure S3. Comparison of xanthine and hypoxanthine as the substrate in the oxidative stress challenge as indicated by RT-qPCR results for COWP7 (top) and thioredoxin (bottom) tests.

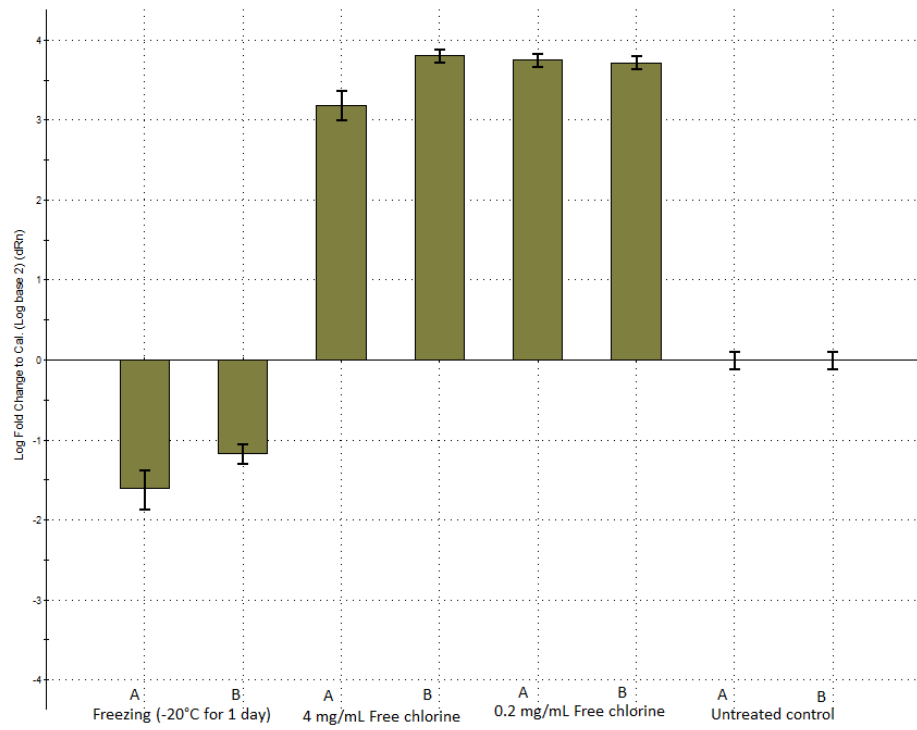

Figure S4. Relative quantity chart for Thioredoxin RT-qPCR test on samples frozen at -20°C for 24 h, treated with 4 mg/L free chlorine, and 0.2 mg/L free chlorine for 30 min (18s rRNA was used as the reference gene).



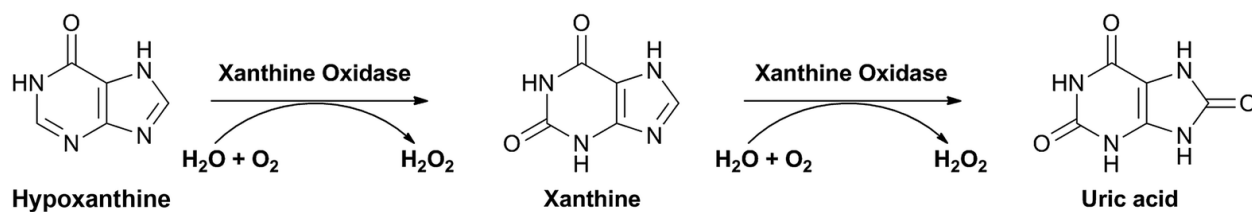

Figure S5. Xanthine oxidase catalyzed reactions. source : [1]

1. Rodrigues, M.V.N.; Corrêa, R.S.; Vanzolini, K.L.; Santos, D.S.; Batista, A.A.; Cass, Q.B. Characterization and screening of tight binding inhibitors of xanthine oxidase: an on-flow assay. *RSC Advances* **2015**, 5, 37533-37538, doi:10.1039/C5RA01741F.
